# Supplementary material for: High catalytic efficiency of amorphous TiB2 and NbB2 nanoparticles for hydrogen storage using the 2LiBH4–MgH2 system
Source: Royal Society of Chemistry journal article supplement (doi:10.1039/c3ta12401k), 2013-01-01
Supplement: c3ta12401k.pdf [file c3ta12401k.pdf]

## Supporting Information

### High catalytic efficiency of amorphous $\text{TiB}_2$ and $\text{NbB}_2$ nanoparticles for the hydrogen storage of $2\text{LiBH}_4/\text{MgH}_2$ system

Xiulin Fan, Xuezhang Xiao, Lixin Chen,\* Xinhua Wang, Shouquan Li, Hongwei Ge  
and Qidong Wang.

Key Laboratory of Advanced Materials and Application for Batteries of Zhejiang  
Province, Department of Materials Science and Engineering, Zhejiang University,  
Hangzhou 310027, PR China

E-mail: [lxchen@zju.edu.cn](mailto:lxchen@zju.edu.cn)

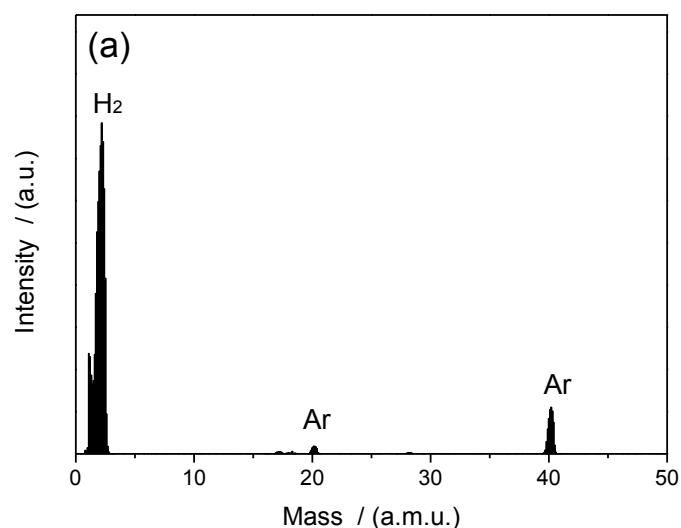

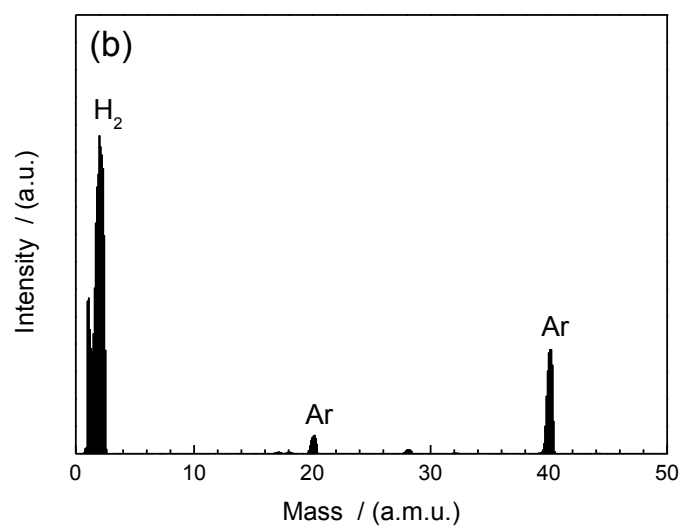

Fig. S1 Mass spectra of released gases from the mixture during ball milling: (a) for the synthesis of  $NbB_2$ ; (b) for the synthesis of  $TiB_2$ .

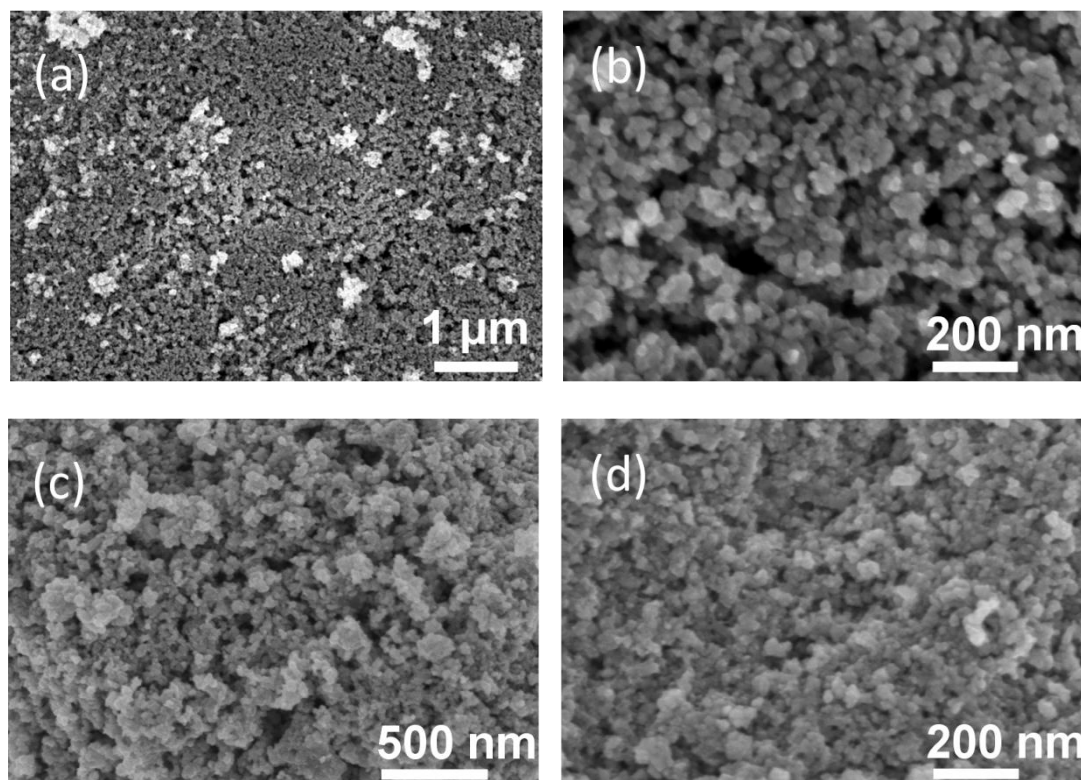

Fig. S2 SEM images of as-synthesized  $NbB_2$  (a), (b); and  $TiB_2$  (c), (d).

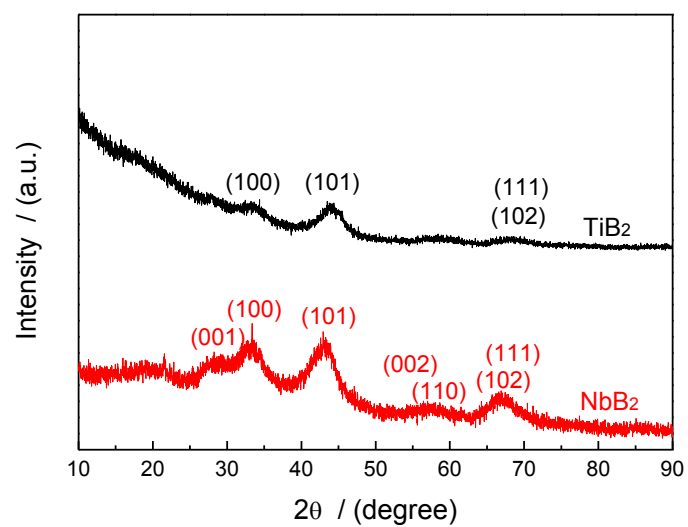

Fig. S3 XRD patterns for synthesized  $\text{TiB}_2$  and  $\text{NbB}_2$  after heat treatment at  $700\text{ }^\circ\text{C}$  for 12 h. Broad peaks indicate that nanocrystallites are formed during heat treatment.

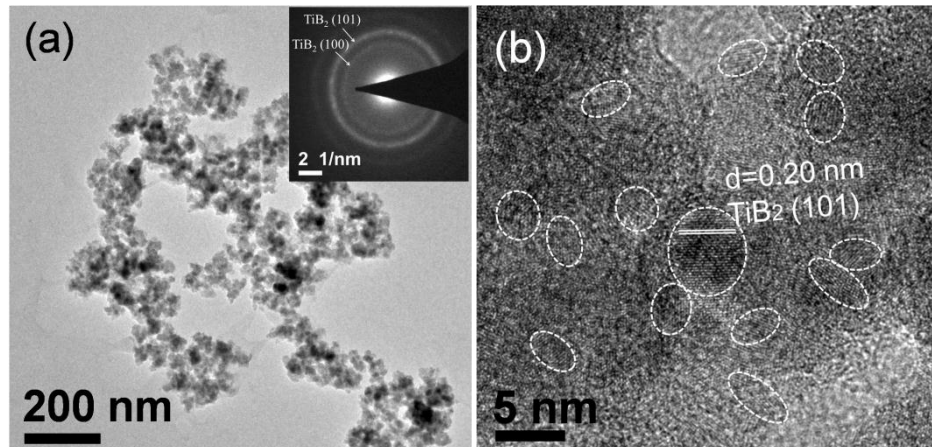

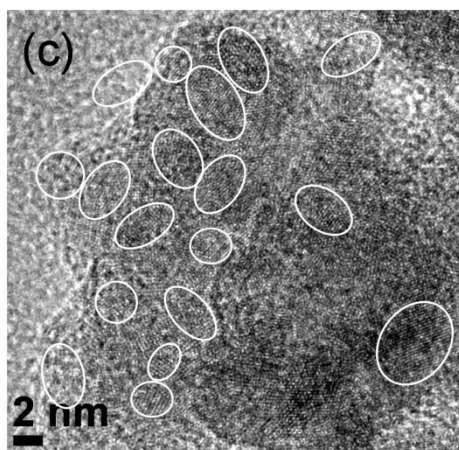

Fig. S4 TEM (a) and HRTEM (b) image for synthesized  $\text{TiB}_2$  after heat treatment at  $700\text{ }^\circ\text{C}$  for 12 h, HRTEM (c) image for synthesized  $\text{NbB}_2$  after heat treatment at  $700\text{ }^\circ\text{C}$  for 12 h. The inset in (a) is the corresponding SAED, which exhibits a conventional diffraction rings of a nanocrystalline phase. Uniform nanocrystallites with size of  $\sim 3\text{ nm}$  can be observed in (b) and (c).

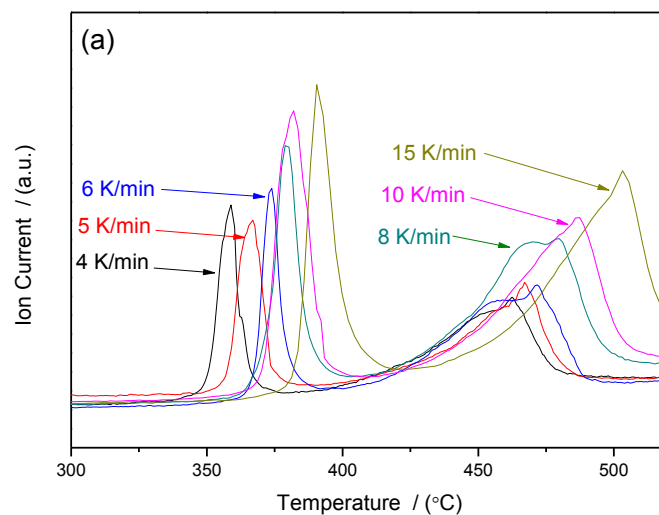

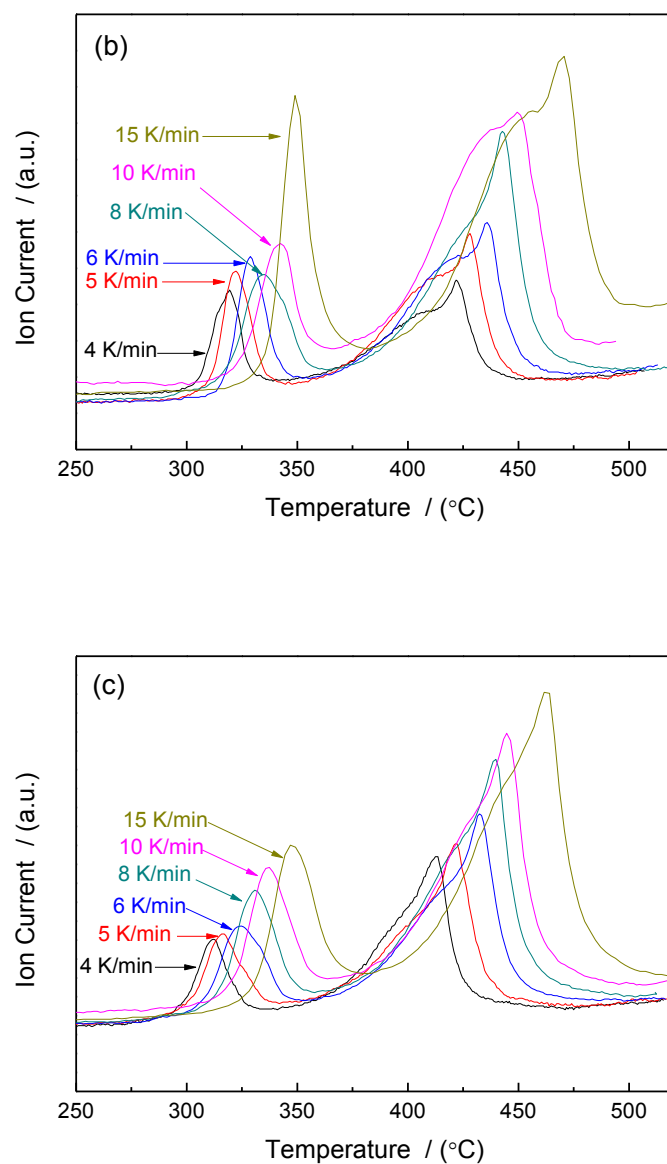

Fig. S5 MS spectra of the  $2\text{LiBH}_4/\text{MgH}_2$  composite: (a) undoped; (b) doped with  $\text{nanoNbB}_2$ ; (c) doped with  $\text{nanoTiB}_2$ .

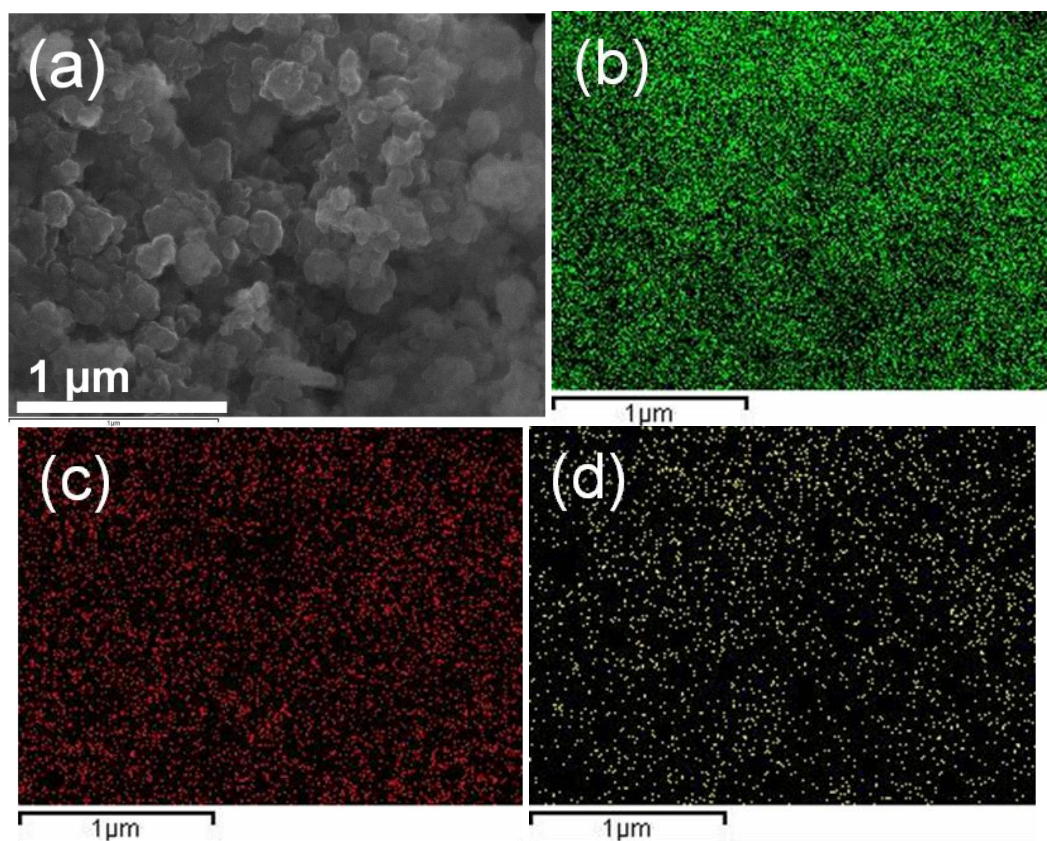

Fig. S6. SEM image (a) and corresponding EDS maps of Mg (b), B (c) and Ti (d) for the nanoTiB<sub>2</sub> doped 2LiBH<sub>4</sub>/MgH<sub>2</sub> after dehydrogenation in the 3rd cycle. The elements of Mg, B and Ti exhibit a homogeneous dispersion in the composite.

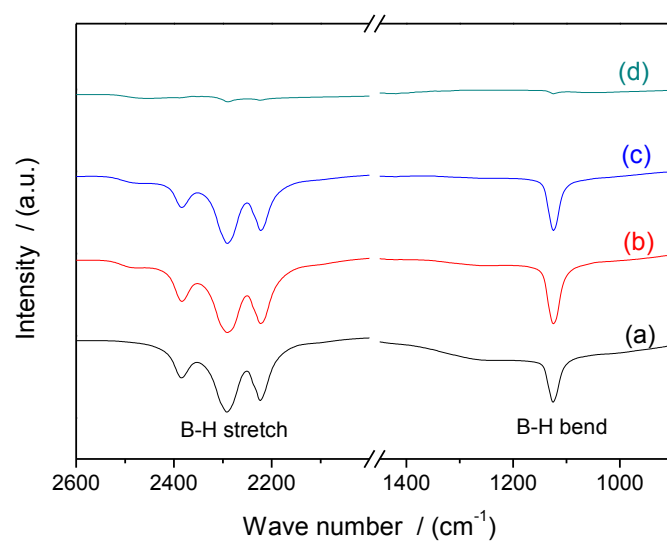

Fig. S7 FTIR spectra of nanoTiB<sub>2</sub>-doped 2LiBH<sub>4</sub>/MgH<sub>2</sub>: (a) after ball milling; (b) after hydrogenation of 3<sup>rd</sup> cycle; (c) after hydrogenation of 5<sup>th</sup> cycle; (d) after dehydrogenation of 6<sup>th</sup> cycle at 400 °C.
